# Supplementary material
Source: Elsevier journal article supplement (https://www.sciencedirect.com/science/article/pii/S0021755719303250)
Supplement: mmc1 [file S0021755719303250:mmc1.docx]

**JPED-2019-283_Supplementary Material**

**Table S1 - Frequency and percentage of reasons for non-suicidal self-injury (NSSI) used by adolescents in the groups with non-suicidal self-injury behaviors (B-NSSI) and with possible non-suicidal self-injury disorder (D-NSSI).**

| **Reasons for NSSI** | **B-NSSI** | |  | **D-NSSI** | | **p** |
| --- | --- | --- | --- | --- | --- | --- |
| **n** | **%** |  | **n** | **%** |
| 1. Not going to school, work, or other activities | 40 | 20.41 |  | 4 | 12.12 | n/s |
| 2. To alleviate feelings of “emptiness” or indifference | 51 | 26.02 |  | 22 | 66.67 | 0.0001 |
| 3. To draw attention to oneself | 41 | 20.92 |  | 7 | 21.21 | n/s |
| 4. To feel something, even if it is pain | 49 | 25.00 |  | 17 | 51.52 | 0.0001 |
| 5. To avoid having to do something “boring,” that I did not want to do | 55 | 28.06 |  | 10 | 30.30 | n/s |
| 6. To control a situation | 57 | 29.08 |  | 13 | 39.39 | n/s |
| 7. To test someone's reaction, even if it’s a negative one | 38 | 19.39 |  | 5 | 15.15 | n/s |
| 8. To get more attention from parents or friends | 44 | 22.45 |  | 11 | 33.33 | n/s |
| 9. To avoid being with other people | 48 | 24.49 |  | 10 | 30.30 | n/s |
| 10. To punish oneself | 46 | 23.47 |  | 15 | 45.45 | 0.0011 |
| 11. To make someone else react differently or change | 40 | 20.41 |  | 9 | 27.27 | n/s |
| 12. To look like someone who respects | 42 | 21.43 |  | 6 | 18.18 | n/s |
| 13. To avoid being punished or dealing with the consequences | 22 | 11.22 |  | – | – | 0.0006 |
| 14. To stop bad feelings/sensations | 66 | 33.67 |  | 22 | 66.67 | 0.0001 |
| 15. To show others how desperate one is | 37 | 18.88 |  | 9 | 27.27 | n/s |
| 16. To feel part of a group | 27 | 13.78 |  | 5 | 15.15 | n/s |
| 17. To make one’s parents understand them better or give them more attention | 53 | 27.04 |  | 14 | 42.42 | 0.0224 |
| 18. To do something when one is alone | 48 | 24.49 |  | 10 | 30.30 | n/s |
| 19. To do something when one is with others | 31 | 15.82 |  | 5 | 15.15 | n/s |
| 20. To ask for help | 36 | 18.37 |  | 13 | 39.39 | 0.001 |
| 21. To make others angry | 36 | 18.37 |  | 6 | 18.18 | n/s |
| 22. To feel relaxed | 55 | 28.06 |  | 19 | 57.58 | 0.0001 |
| 23. Others: | 18 | 9.18 |  | 4 | 12.12 | n/s |
|  |  |  |  |  |  |  |

n/s, non-significant.
